# Supplementary material for: Tranexamic acid for treatment of women with post-partum haemorrhage in Nigeria and Pakistan: a cost-effectiveness analysis of data from the WOMAN trial
Source: PubMed Central journal article supplement (PMC5785366; doi:10.1016/s2214-109x(17)30467-9), 2018-01-19
Supplement: mmc1.pdf [file mmc1.pdf]

# THE LANCET

## Global Health

### Supplementary appendix

This appendix formed part of the original submission and has been peer reviewed. We post it as supplied by the authors.

Supplement to: Li B, Miners A, Shakur H, Roberts I, on behalf of the WOMAN Trial Collaborators. Tranexamic acid for treatment of women with post-partum haemorrhage in Nigeria and Pakistan: a cost-effectiveness analysis of data from the WOMAN trial. *Lancet Glob Health* 2018; **6**: e222–28.

## Supplementary appendix

### Number of ICU days and length of stay for patients who received treatment within 3 hours of giving birth in the WOMAN trial showing no difference between arms

|                                                      | TXA         | No TXA      | p value |
|------------------------------------------------------|-------------|-------------|---------|
| ICU days                                             |             |             |         |
| n                                                    | 7517        | 7407        |         |
| Mean (SD)                                            | 0.18 (1.13) | 0.17 (0.93) | 0.772   |
| Median (IQR)                                         | 0 (0-0)     | 0 (0-0)     |         |
| Length of stay (randomisation to discharge in days)* |             |             |         |
| n                                                    | 7381        | 7244        |         |
| Mean (SD)                                            | 3.40 (3.70) | 3.42 (3.88) | 0.726   |
| Median (IQR)                                         | 2 (1-4)     | 2 (1-4)     |         |

\*Excludes patients who died
